# Supplementary material for: Transcriptome profile of spleen tissues from locally-adapted Kenyan pigs (Sus scrofa) experimentally infected with three varying doses of a highly virulent African swine fever virus genotype IX isolate: Ken12/busia.1 (Ken-1033)
Source: Research Square preprint supplement (doi:10.21203/rs.3.rs-1543326/v1), 2022-04-14

A

## Enriched Pathways

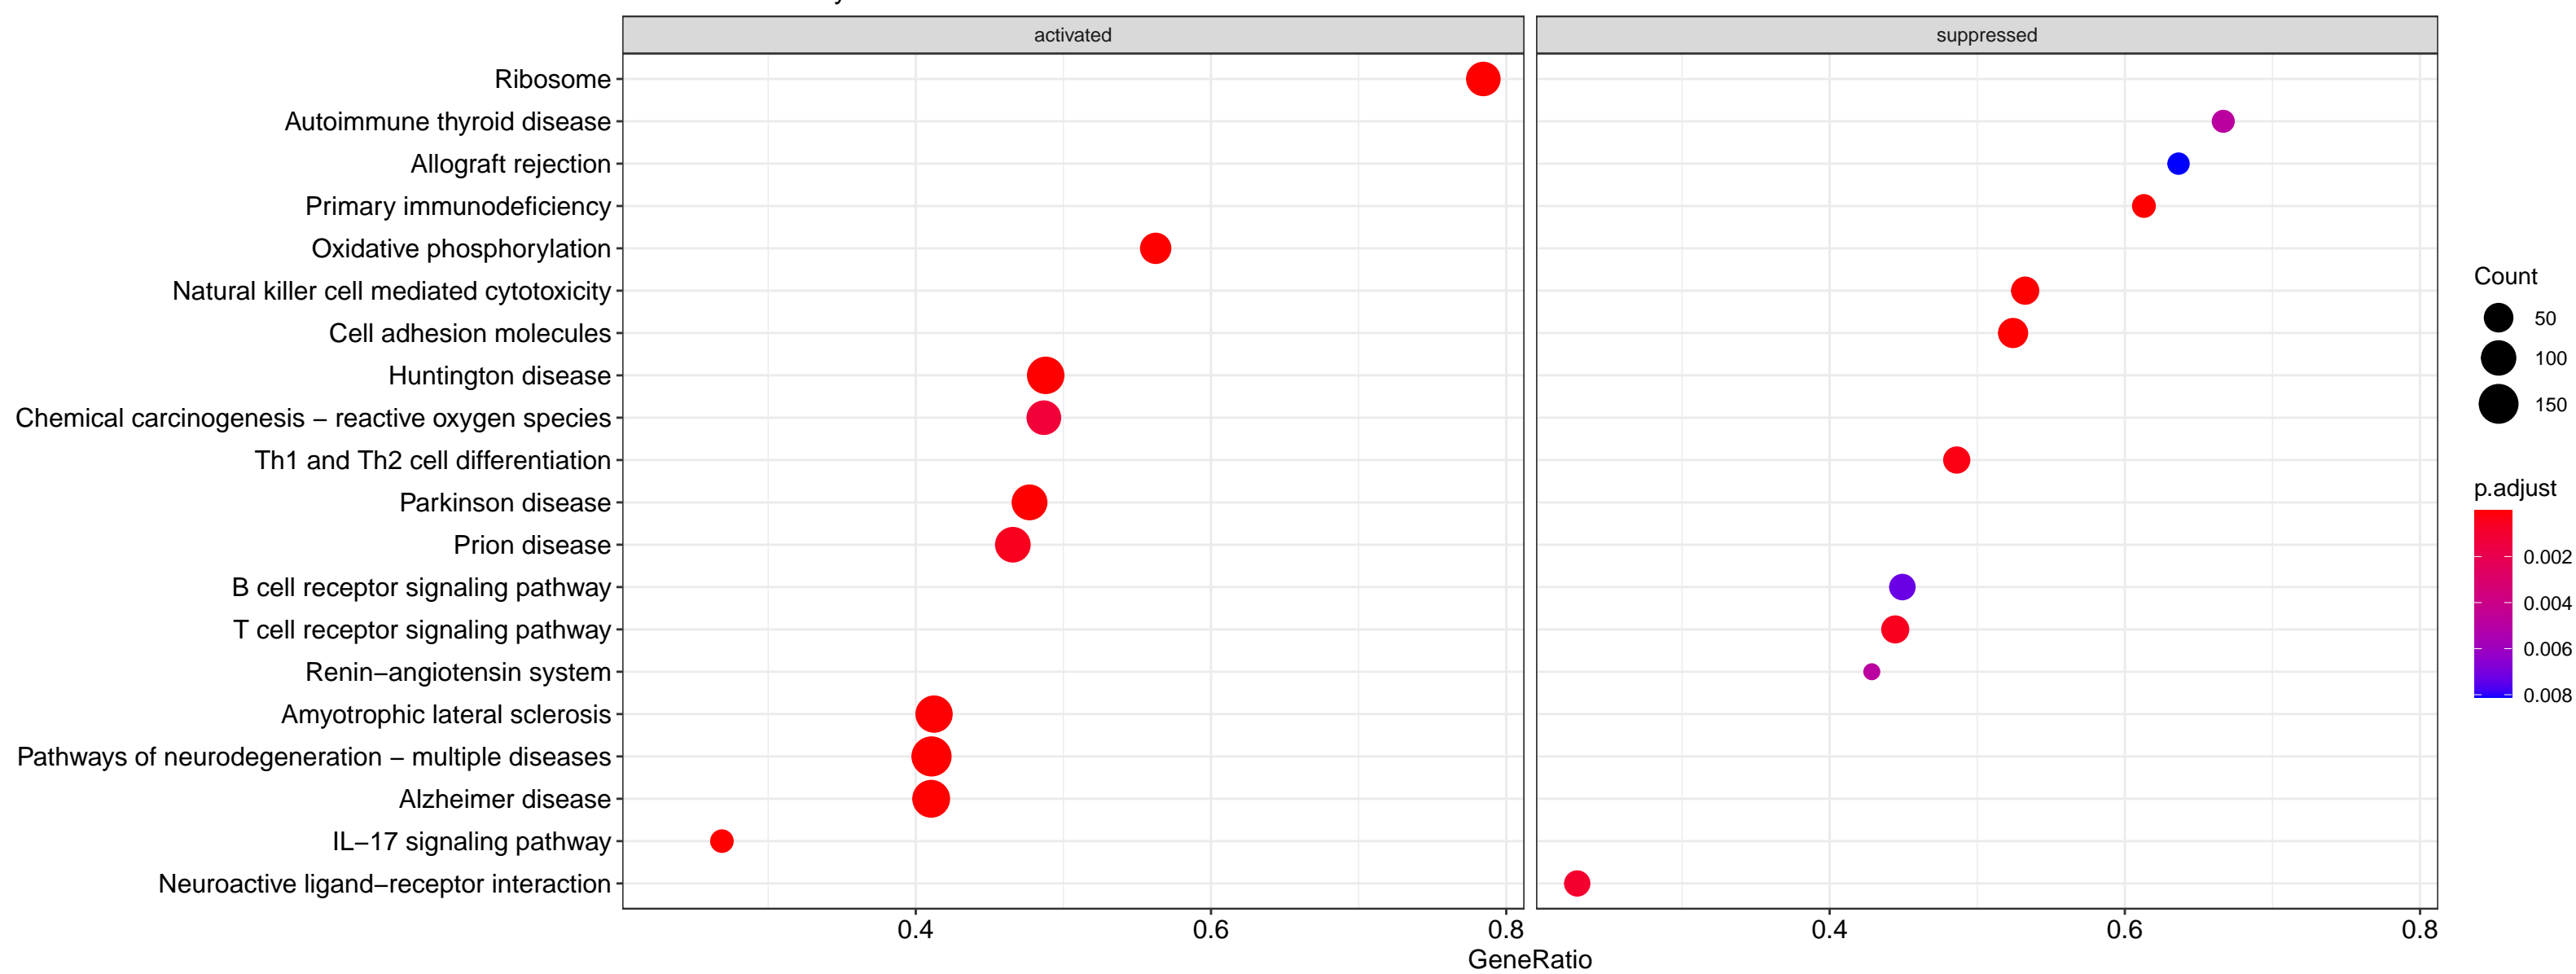

B

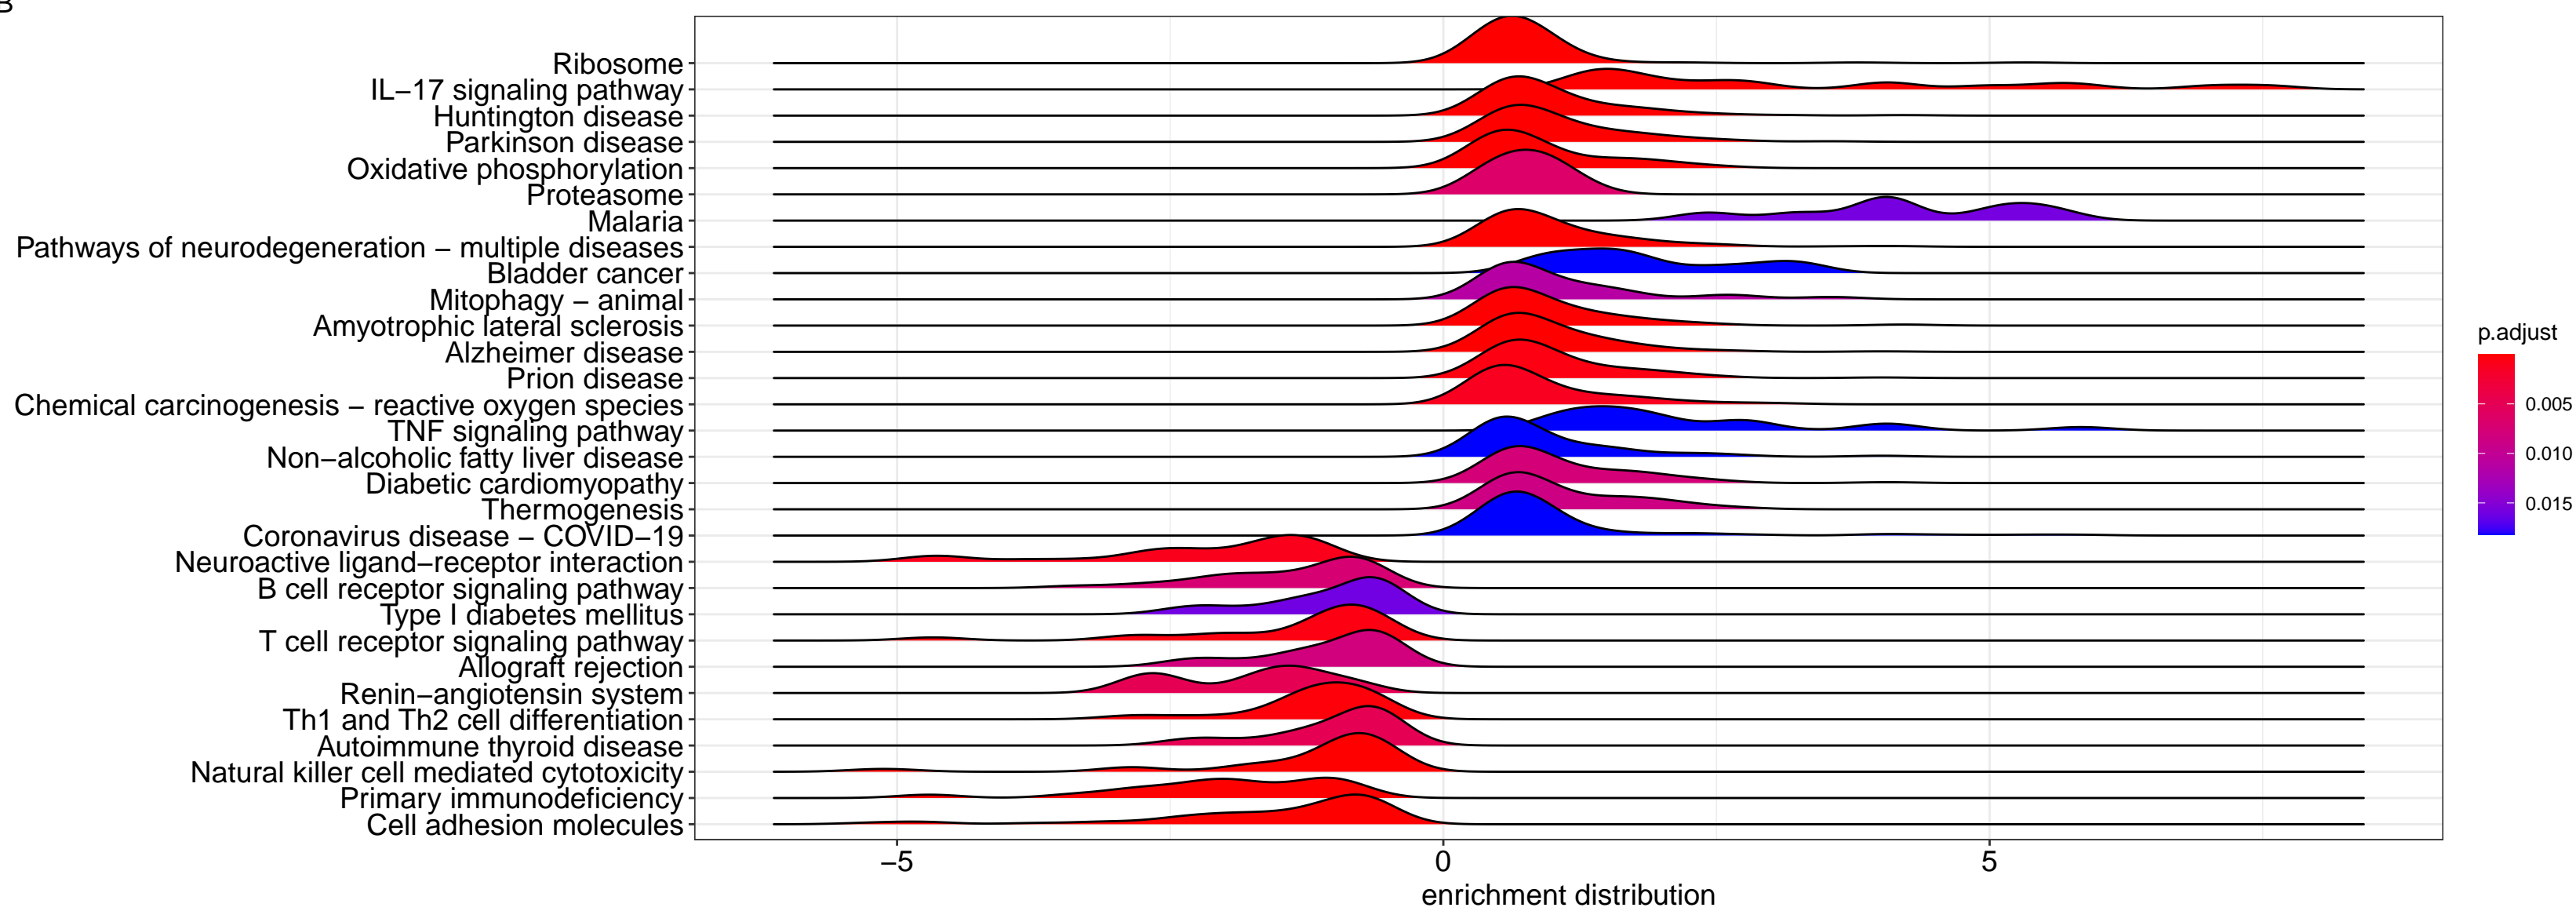

C

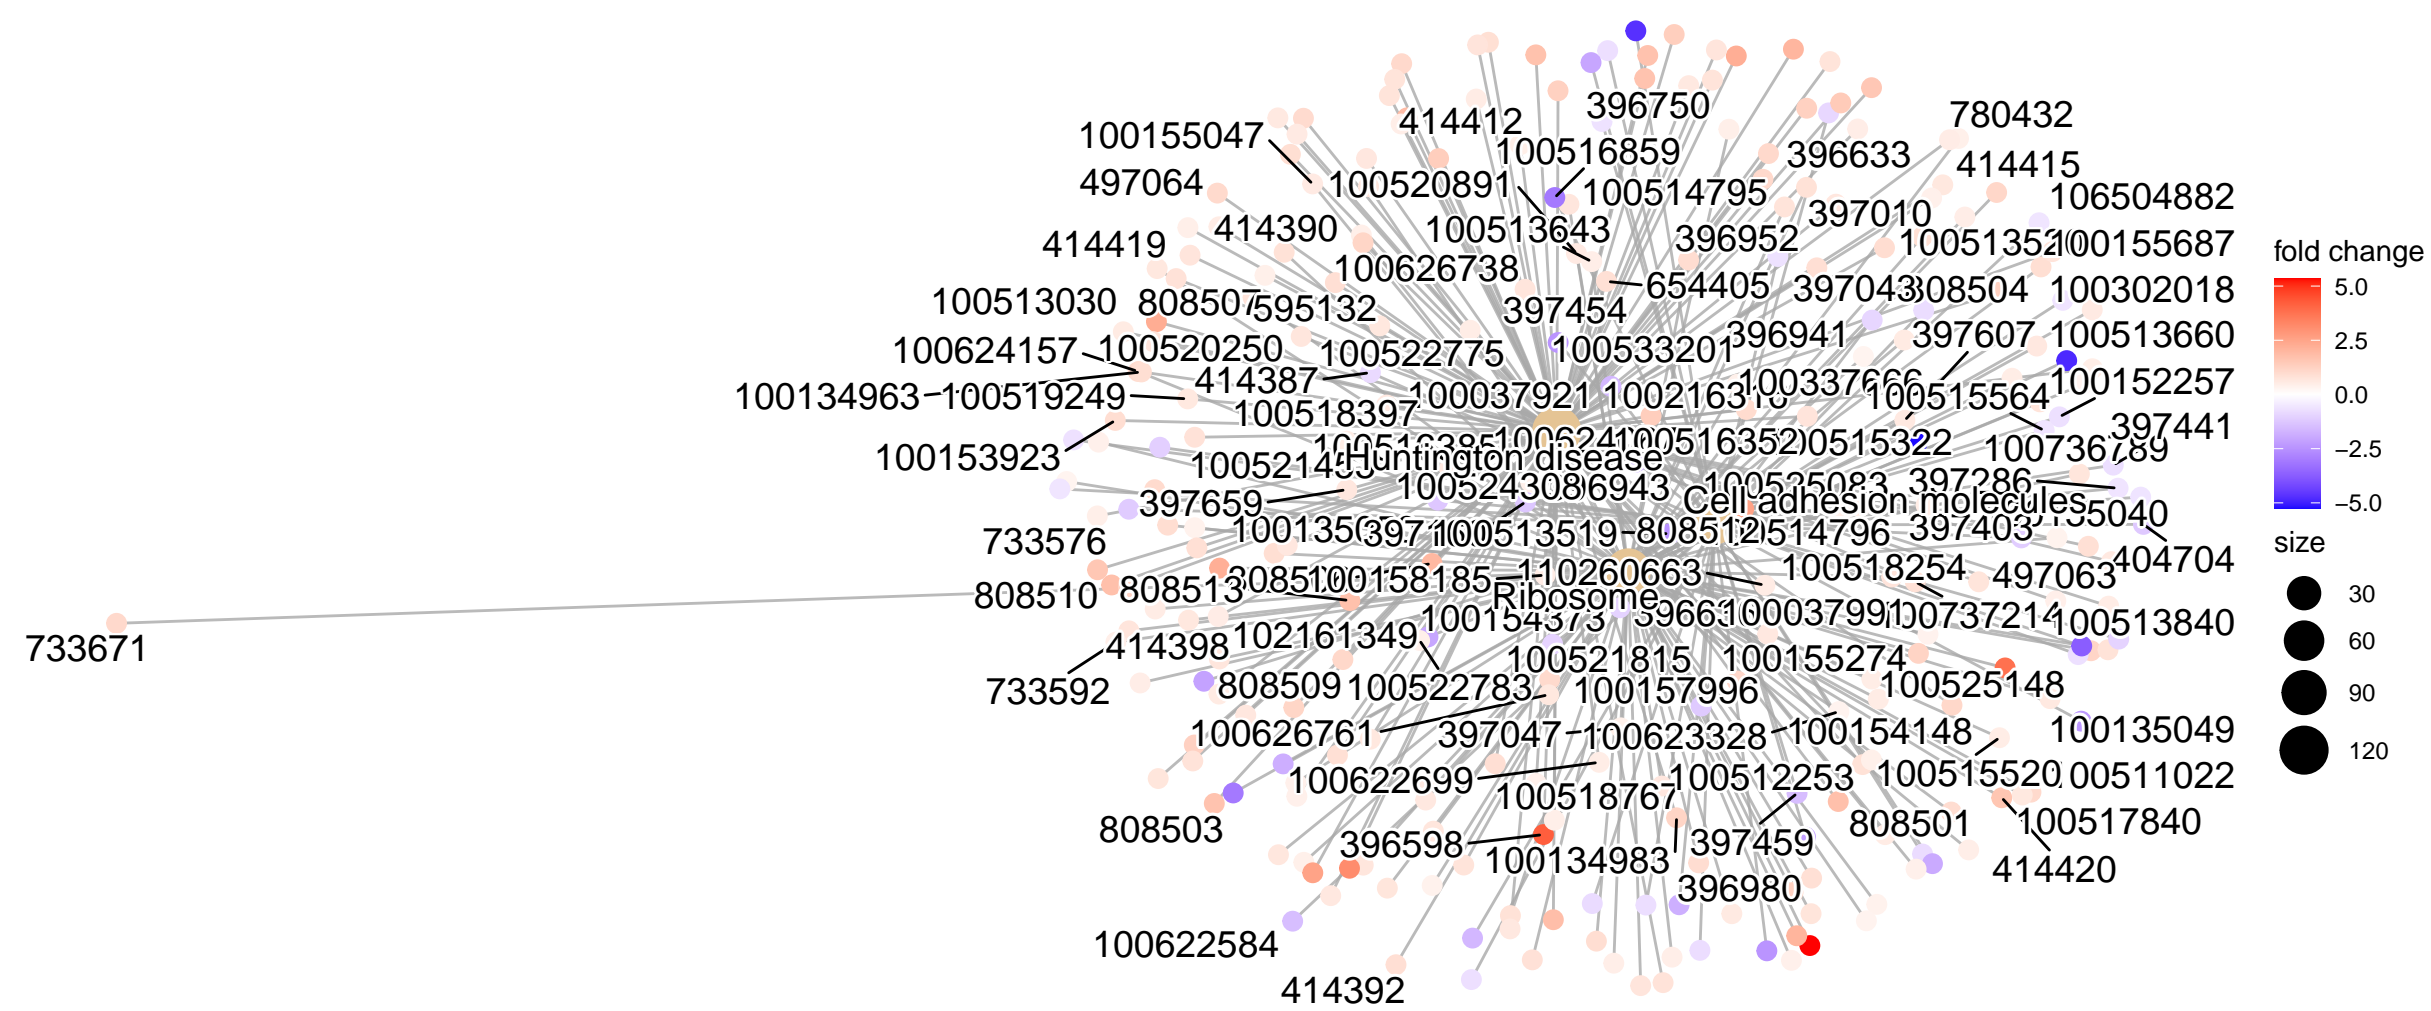

Supplement: Supplementary file [file 8c7bd9d352b48f33ff13a084.zip]
